# Supplementary material for: Design of luminescent complexes with different Cu4I4 cores based on pyridyl phenoxarsines
Source: Royal Society of Chemistry journal article supplement (doi:10.1039/d3dt03273f), 2023-12-15
Supplement: d3dt03273f1.pdf [file d3dt03273f1.pdf]

## Supporting Information

# Design of luminescent complexes with different Cu<sub>4</sub>I<sub>4</sub> cores based on pyridyl phenoxarsines

Milyausha F. Galimova,<sup>\*[a]</sup> Ekaterina M. Zueva,<sup>[b]</sup> Maria M. Petrova,<sup>[b]</sup>  
Alexey B. Dobrynin,<sup>[a]</sup> Ilya E. Kolesnikov,<sup>[c]</sup> Elvira I. Musina,<sup>[a]</sup> Rustem R. Musin,<sup>[b]</sup>  
Andrey A. Karasik,<sup>[a]</sup> Oleg G. Sinyashin<sup>[a]</sup>

<sup>[a]</sup> Arbuzov Institute of Organic and Physical Chemistry, FRC Kazan Scientific Center, Russian Academy of Sciences, 8 Arbuzov Street, 420088 Kazan, Russian Federation.

E-mail: milya1949@mail.ru

<sup>[b]</sup> Kazan National Research Technological University, 68 K. Marx Street, 420015 Kazan, Russian Federation

<sup>[c]</sup> Center for Optical and Laser Materials Research, St. Petersburg University, 5 Ulianovskaya Street, 198504 Saint Petersburg, Russian Federation

## Table of Contents

|   |                                                                                                         |     |
|---|---------------------------------------------------------------------------------------------------------|-----|
| 1 | $^1\text{H}$ NMR spectra of ligands and complexes                                                       | S3  |
| 2 | Single-crystal and powder X-ray diffraction data                                                        | S5  |
| 3 | Photophysical properties                                                                                | S13 |
| 4 | A collection of the $\text{Cu}\cdots\text{Cu}$ distance for different $\text{Cu}_4\text{I}_4$ tetramers | S18 |

# 1. <sup>1</sup>H NMR spectra of ligands and complexes

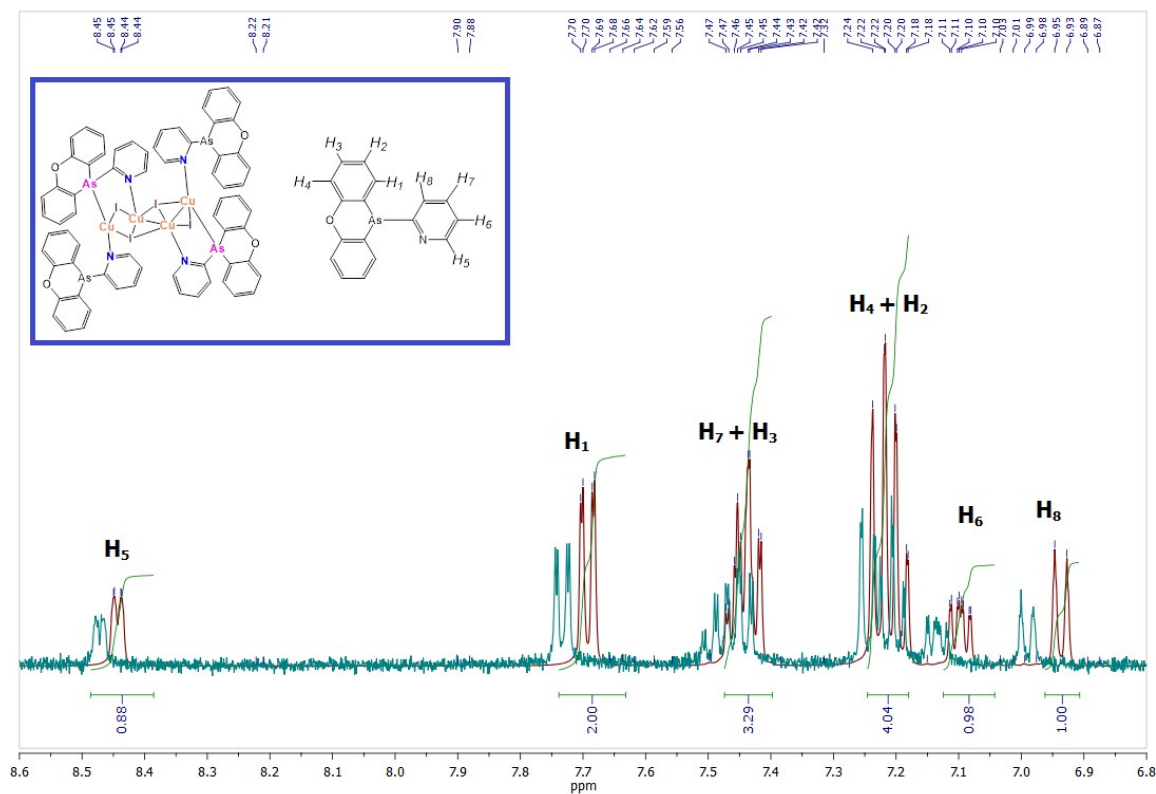

**Figure S1.** Comparison of <sup>1</sup>H NMR spectra for ligand **1** (red line) and complex **5** (green line) measured in CD<sub>3</sub>CN (the range from 6.60 to 7.80 ppm is shown). The integrated intensities of NMR signals are given for red spectrum.

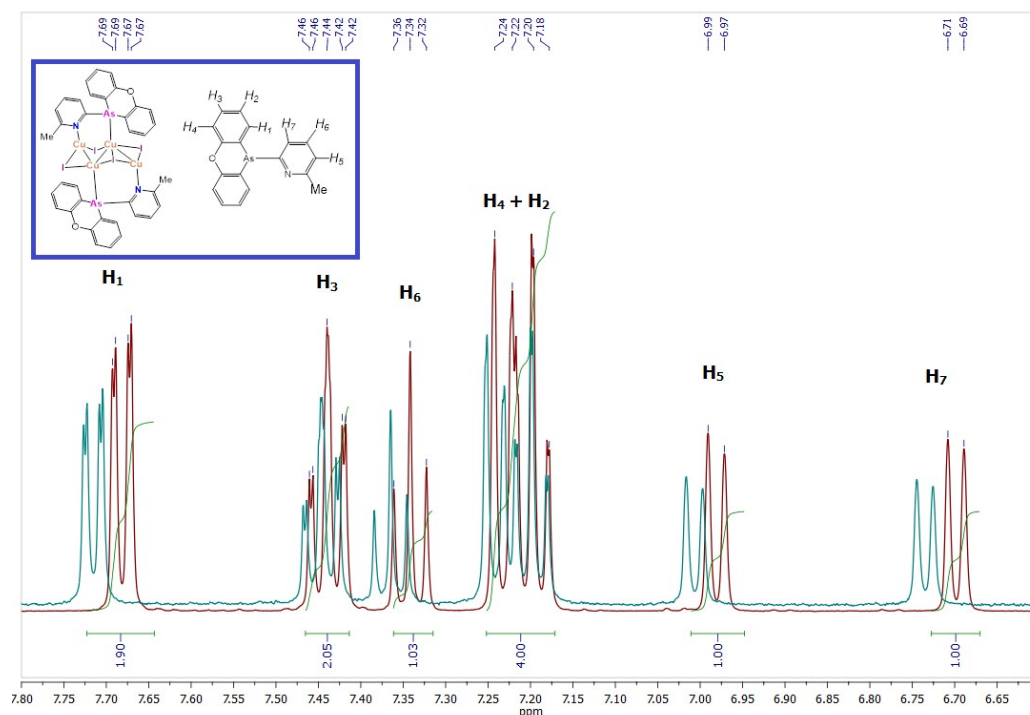

**Figure S2.** Comparison of <sup>1</sup>H NMR spectra for ligand **2** (red line) and complex **6** (green line) measured in CD<sub>3</sub>CN (the range from 6.60 to 7.80 ppm is shown). The integrated intensities of NMR signals are given for red spectrum.

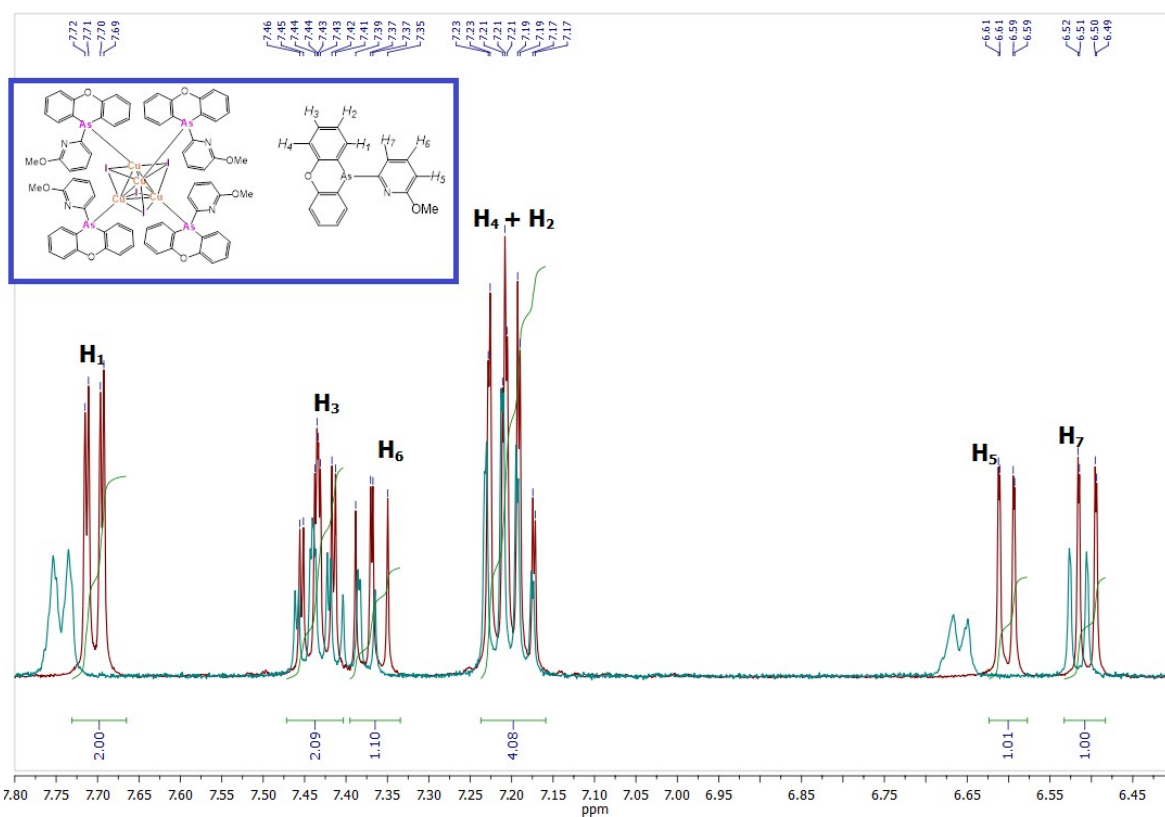

**Figure S3.** Comparison of  $^1\text{H}$  NMR spectra for ligand **3** (red line) and complex **7** (green line) measured in  $\text{CD}_3\text{CN}$  (the range from 6.40 to 7.80 ppm is shown). The integrated intensities of NMR signals are given for red spectrum.

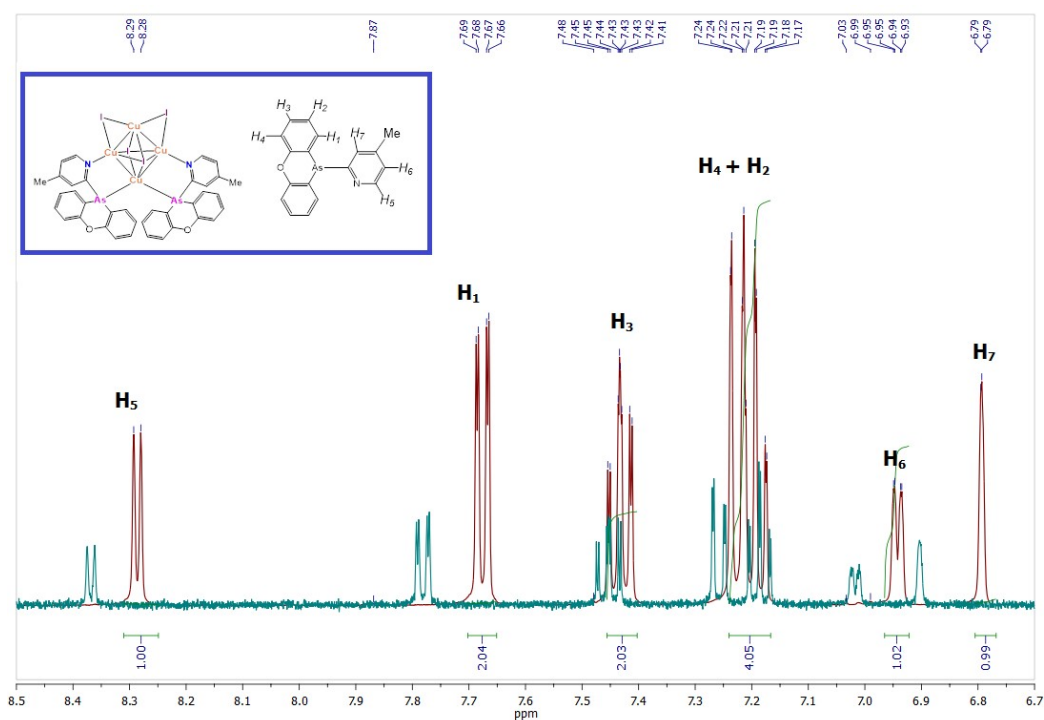

**Figure S4.** Comparison of  $^1\text{H}$  NMR spectra for ligand **4** (red line) and complex **8** (green line) measured in  $\text{CD}_3\text{CN}$  (the range from 6.40 to 7.80 ppm is shown). The integrated intensities of NMR signals are given for red spectrum.

## 2. Single-crystal and powder X-ray diffraction data

**Table S1.** Crystal data and refinement details for ligands **2–4**.

|                                                       | <b>2</b>                | <b>3</b>                  | <b>4</b>                  |
|-------------------------------------------------------|-------------------------|---------------------------|---------------------------|
| empirical formula                                     | C18 H14 As N O          | C18 H14 As N O2           | C18 H14 As N O            |
| fw                                                    | 335.22                  | 351.22                    | 335.22                    |
| temp.                                                 | 130                     | 106                       | 130                       |
| cryst syst                                            | orthorhombic            | monoclinic                | monoclinic                |
| space group                                           | <i>Pna</i> 21           | <i>P</i> 21/ <i>n</i>     | <i>P</i> 21/ <i>n</i>     |
| <i>a</i> (Å)                                          | 20.8156(7)              | 13.8229(10)               | 11.7742(2)                |
| <i>b</i> (Å)                                          | 11.5695(4)              | 5.9104(4)                 | 18.4805(2)                |
| <i>c</i> (Å)                                          | 6.0573(2)               | 18.3375(13)               | 13.5881(2)                |
| $\alpha$ (deg)                                        | 90                      | 90                        | 90                        |
| $\beta$ (deg)                                         | 90                      | 98.575(3)                 | 90.270(1)                 |
| $\gamma$ (deg)                                        | 90                      | 90                        | 90                        |
| vol (Å <sup>3</sup> )                                 | 1458.76(9)              | 1481.41(18)               | 2956.64(7)                |
| Z                                                     | 4                       | 4                         | 8                         |
| density (calcd) (Mg/m <sup>3</sup> )                  | 1.526                   | 1.575                     | 1.506                     |
| Abs.coeff (mm <sup>-1</sup> )                         | 2.327                   | 2.301                     | 2.297                     |
| F(000)                                                | 680                     | 712                       | 1360                      |
| cryst size (mm <sup>3</sup> )                         | 0.05 x 0.10 x 0.60      | 0.05 x 0.05 x 0.09        | 0.20 x 0.30 x 0.40        |
| $\theta$ range (deg)                                  | 2.0, 32.6               | 1.7, 29.0                 | 1.9, 32.4                 |
| index ranges                                          | -30: 31; -16: 15; -9: 9 | -18: 18 ; -8: 8 ; -25: 25 | -17: 16; -26: 27; -20: 19 |
| reflns collected                                      | 13757                   | 67222                     | 44419                     |
| independent ( <i>R</i> <sub>int</sub> )               | 4854, 0.050             | 3935, 0.045               | 9928, 0.037               |
| data/restraints/parameters                            | 4854, 1, 191            | 3935, 0, 200              | 9928, 0, 381              |
| final R indices                                       |                         |                           |                           |
| <i>R</i> <sub>1</sub>                                 | 0.0439                  | 0.0264                    | 0.0329                    |
| w <i>R</i> <sub>2</sub>                               | 0.0958                  | 0.0721                    | 0.0733                    |
| R indices (all data)                                  |                         |                           |                           |
| <i>R</i> <sub>1</sub>                                 | 0.0612                  | 0.0270                    | 0.0507                    |
| w <i>R</i> <sub>2</sub>                               | 0.1067                  | 0.0726                    | 0.0813                    |
| goodness-of-fit on <i>F</i> <sub>2</sub>              | 1.03                    | 1.14                      | 1.05                      |
| largest difference peak and hole (e Å <sup>-3</sup> ) | 0.75, -0.63             | 1.01, -0.34               | 0.49, -0.57               |

**Table S2.** Crystal data and refinement details for Cu(I) complexes **5–8**.

|                                                       | <b>5</b>                  | <b>6</b>                  | <b>6</b>                  | <b>7a</b>                 | <b>8</b>                  |
|-------------------------------------------------------|---------------------------|---------------------------|---------------------------|---------------------------|---------------------------|
| measurement temperature (K)                           | 293                       | 130                       | 298                       | 100                       | 293                       |
| empirical formula                                     | C68 H48 As4 Cu4 I4        | C36 H28 As2 Cu4 I4        | C36 H28 As2 Cu4 I4        | C56 H45 As3 Cu4 I4        | C36 H28 As2 Cu4 I4        |
| fw                                                    | N4 O4                     | N2 O2                     | N2 O2                     | N4 O6                     | N2 O2                     |
| cryst syst                                            | 2046.58                   | 1432.20                   | 1432.24                   | 1856.52                   | 1432.25                   |
| space group                                           | triclinic                 | triclinic                 | triclinic                 | monoclinic                | triclinic                 |
| <i>a</i> (Å)                                          | <i>P</i> -1               | <i>P</i> -1               | <i>P</i> -1               | <i>P</i> 21/ <i>c</i>     | <i>P</i> -1               |
| <i>b</i> (Å)                                          | 10.1142(18)               | 10.0169(2)                | 10.0801(17)               | 21.9973(18)               | 12.740(3)                 |
| <i>c</i> (Å)                                          | 11.804(2)                 | 10.2066(2)                | 10.3208(18)               | 16.6381(12)               | 12.961(3)                 |
| $\alpha$ (deg)                                        | 14.647(3)                 | 10.8297(2)                | 10.9161(19)               | 17.2785(13)               | 14.868(3)                 |
| $\beta$ (deg)                                         | 81.337(10)                | 102.188(2)                | 103.093(7)                | 90                        | 117.28(3)                 |
| $\gamma$ (deg)                                        | 86.102(10)                | 100.864(2)                | 100.312(7)                | 109.356(3)                | 110.95(3)                 |
| vol (Å <sup>3</sup> )                                 | 70.406(9)                 | 110.067(2)                | 109.725(6)                | 90                        | 90.70(3)                  |
| Z                                                     | 1628.3(5)                 | 974.64(4)                 | 1000.0(3)                 | 5966.4(8)                 | 1991.4(12)                |
| density (calcd) (Mg/m <sup>3</sup> )                  | 1                         | 1                         | 1                         | 4                         | 2                         |
| Abs.coeff (mm <sup>-1</sup> )                         | 2.087                     | 2.440                     | 2.378                     | 2.067                     | 2.389                     |
| F(000)                                                | 5.253                     | 7.040                     | 6.862                     | 5.179                     | 6.891                     |
| cryst size (mm <sup>3</sup> )                         | 976                       | 668                       | 668                       | 3536                      | 1336                      |
| $\theta$ range (deg)                                  | 0.06 x 0.11 x 0.21        | 0.12 x 0.23 x 0.37        | 0.20 x 0.25 x 0.35        | 0.06 x 0.12 x 0.19        | 0.05 x 0.12 x 0.23        |
| index ranges                                          | 1.4, 27.0                 | 2.0, 35.7                 | 2.2, 36.2                 | 1.6, 30.6                 | 1.7, 27.0                 |
| reflns collected                                      | -12: 12; -15: 14; -18: 18 | -16: 15; -16: 16; -17: 17 | -16: 16; -16: 16; -18: 18 | -31: 31; -23: 23; -24: 24 | -16: 14 ; -16: 14 ; 0: 18 |
| independent (R <sub>int</sub> )                       | 37415                     | 34231                     | 84543                     | 236865                    | 14251                     |
| data/restraints/parameters                            | 7046, 0.091               | 8651, 0.023               | 9081, 0.056               | 18284, 0.096              | 14251, 0.000              |
| final R indices                                       | 7046, 0, 397              | 8651, 0, 227              | 9081, 0, 227              | 18284, 0, 698             | 14251, 0, 464             |
| R <sub>1</sub>                                        | 0.0568                    | 0.0249                    | 0.0314                    | 0.0793                    | 0.0474                    |
| wR <sub>2</sub>                                       | 0.1605                    | 0.0570                    | 0.1099                    | 0.2119                    | 0.1105                    |
| R indices (all data)                                  |                           |                           |                           |                           |                           |
| R <sub>1</sub>                                        | 0.0878                    | 0.0287                    | 0.0372                    | 0.0875                    | 0.0547                    |
| wR <sub>2</sub>                                       | 0.2190                    | 0.0586                    | 0.1144                    | 0.2153                    | 0.1142                    |
| goodness-of-fit on F <sub>2</sub>                     | 1.09                      | 1.05                      | 0.89                      | 1.20                      | 1.08                      |
| largest difference peak and hole (e Å <sup>-3</sup> ) | 1.80, -2.55               | 0.54, -1.31               | 1.36, -1.23               | 4.78, -1.65               | 3.01, -3.45               |

**Table S3.** Selected distances (in Å) and angles (°) between the atoms of ligands **2–4**.

| Structural parameters / <b>R</b> at the arsenic atom                     | <b>2</b>      | <b>3</b>         | <b>4</b>      |          |
|--------------------------------------------------------------------------|---------------|------------------|---------------|----------|
|                                                                          |               |                  | <b>A</b>      | <b>B</b> |
|                                                                          | <b>6-MePy</b> | <b>6-(MeO)Py</b> | <b>4-MePy</b> |          |
| As1... <i>P</i> <sub>C1C6C7C12</sub>                                     | 0.522         | 0.412            | 0.293         | 0.367    |
| O1... <i>P</i> <sub>C1C6C7C12</sub>                                      | 0.292         | 0.271            | 0.208         | 0.241    |
| O1-As1-C <sub>Ar</sub>                                                   | 81.64         | 85.49            | 90.01         | 86.59    |
| As1...C13                                                                | 1.985         | 1.968            | 1.970         | 1.965    |
| ∠C13-As1-C1                                                              | 98.49         | 99.02            | 96.70         | 94.78    |
| ∠C13-As1-C12                                                             | 95.95         | 96.14            | 98.77         | 99.48    |
| ∠C1-As1-C12                                                              | 92.99         | 93.73            | 94.75         | 94.59    |
| Σ                                                                        | 287.43        | 288.89           | 290.22        | 288.85   |
| ∠C6-O1-C7                                                                | 121.33        | 122.21           | 123.54        | 122.82   |
| ∠ <i>P</i> <sub>C1C2C3C4C5C6</sub> - <i>P</i> <sub>C7C8C9C10C11C12</sub> | 27.35         | 25.41            | 18.18         | 21.15    |
| ∠ <i>P</i> <sub>C1C6C7C12</sub> - <i>P</i> <sub>C13C14C15C16C17C18</sub> | 80.12         | 85.25            | 89.38         | 84.30    |
| ∠O1-As1-C13-C14                                                          | 41.43         | 55.21            | 47.87         | 63.62    |

**Table S4.** Selected interatomic distances (in Å) and angles (in °) in complex **5**.

| structural parameters | <b>5</b> |
|-----------------------|----------|
| Cu1-Cu2               | 2.696(1) |
| Cu1-Cu1'              | 2.797(2) |
| Cu1...Cu2'            | 4.538(2) |
| Cu1-I2                | 2.638(1) |
| Cu2-I2                | 2.660(1) |
| Cu1-I1                | 2.666(1) |
| Cu1-I1'               | 2.672(1) |
| Cu2-I1                | 2.678(1) |
| Cu2-As3               | 2.331(2) |
| Cu1-N4                | 2.083(9) |
| Cu2-N3                | 2.011(8) |
| Cu-Cu-Cu'             | 111.44   |
| Cu-N-As-Cu'           | 0.65     |

**Table S5.** Selected interatomic distances (in Å) and angles (in °) in complex **6**.

| structural parameters   | <b>6</b>  |           |
|-------------------------|-----------|-----------|
| measurement temperature | 298 K     | 130 K     |
| Cu1-Cu2                 | 2.7018(6) | 2.6761(4) |
| Cu1-Cu1'                | 2.7437(6) | 2.7250(4) |
| Cu1...Cu2'              | 2.9801(7) | 2.9674(4) |
| Cu1-I2                  | 2.6761(6) | 2.6743(3) |
| Cu2-I2                  | 2.4980(5) | 2.4975(4) |
| Cu1-I1                  | 2.7381(6) | 2.7176(4) |
| Cu1-I1                  | 2.6701(6) | 2.6611(3) |
| Cu2-I1                  | 2.6426(6) | 2.6354(4) |
| Cu1-As1                 | 2.3823(5) | 2.3746(4) |
| Cu2-N1                  | 1.988(2)  | 1.982(2)  |
| Cu-Cu-Cu'               | 66.35     | 66.64     |
| Cu-N-As-Cu'             | 27.28     | 27.35     |



**Table S6.** Selected interatomic distances (in Å) in complex **7**.

| structural parameters | <b>7</b> |
|-----------------------|----------|
| Cu2-Cu3               | 2.692(2) |
| Cu1-Cu2               | 2.676(2) |
| Cu1-Cu3               | 2.816(2) |
| Cu3-Cu4               | 2.666(2) |
| Cu1-Cu4               | 2.732(2) |
| Cu2-Cu4               | 2.711(1) |
| Cu1-I1                | 2.671(1) |
| Cu2-I1                | 2.696(2) |
| Cu3-I1                | 2.689(1) |
| Cu2-I2                | 2.663(1) |
| Cu3-I2                | 2.656(1) |
| Cu4-I2                | 2.700(1) |
| Cu1-I3                | 2.650(1) |
| Cu3-I3                | 2.681(1) |
| Cu4-I3                | 2.696(2) |
| Cu1-I4                | 2.690(2) |
| Cu3-I4                | 2.662(1) |
| Cu4-I4                | 2.681(1) |
| Cu2-As3               | 2.351(1) |
| Cu3-As2               | 2.353(2) |
| Cu4-As1               | 2.353(1) |
| Cu1-N60               | 1.990(8) |

**Table S7.** Selected interatomic distances (in Å) and angles (in °) in complex **8**.

| Structural parameters | Complex <b>8</b> |
|-----------------------|------------------|
| Cu3-Cu4               | 2.522(2)         |
| Cu1-Cu4               | 2.726(3)         |
| Cu1-Cu2               | 2.747(2)         |
| Cu2-Cu3               | 2.589 (2)        |
| Cu4-I4                | 2.634(2)         |
| Cu3-I4                | 2.519(2)         |
| Cu2-I3                | 2.660(2)         |
| Cu3-I3                | 2.479(1)         |
| Cu4-I2                | 2.770(2)         |
| Cu3-I2                | 3.300(1)         |
| Cu2-I2                | 2.785(2)         |
| Cu1-I2                | 2.642(2)         |
| Cu1-I1                | 2.623(2)         |
| Cu2-I1                | 2.787 (2)        |
| Cu3-I1                | 2.775 (2)        |
| Cu4-I1                | 2.819(2)         |
| Cu1-As1               | 2.347(2)         |
| Cu4-N1                | 2.032(9)         |
| Cu1-As2               | 2.342(2)         |
| Cu2-N2                | 2.026(1)         |
| Cu2-N2-As2-Cu1        | 7.88(3)          |
| Cu4-N1-As1-Cu1        | 9.38(3)          |

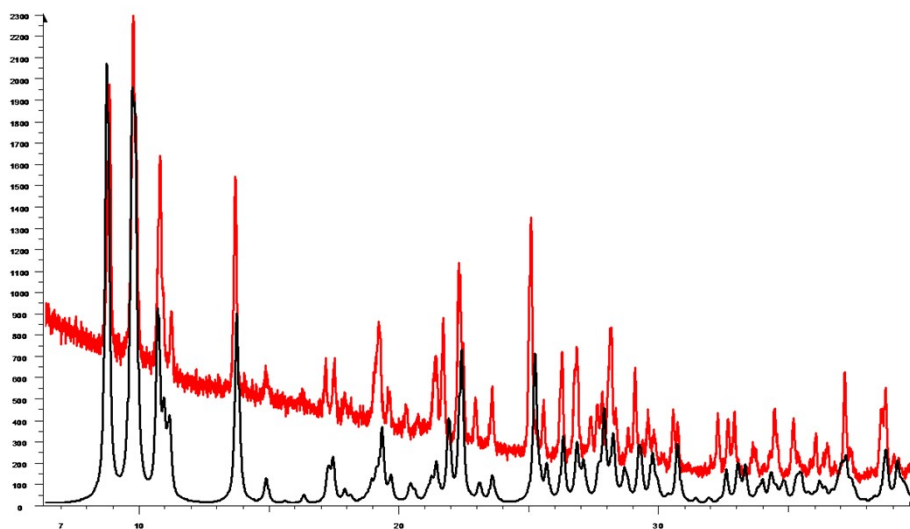

**Figure S5.** The simulated powder diffractogram (black line) calculated from the single-crystal X-ray data for **5** and the experimental powder diffractogram (red line) of the dried powder sample.

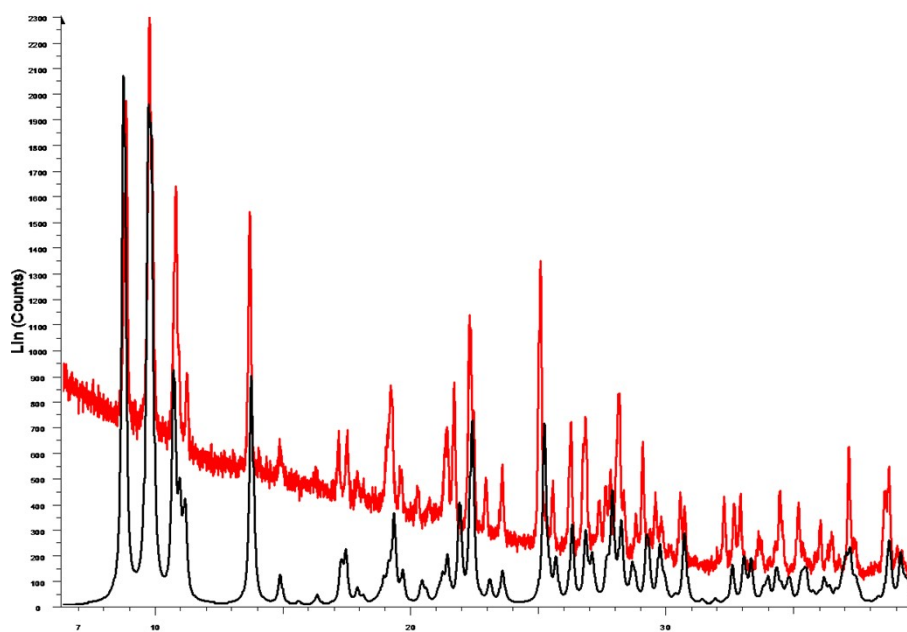

**Figure S6.** The simulated powder diffractogram (black line) calculated from the single-crystal X-ray data for **6** and the experimental powder diffractogram (red line) of the dried powder sample.

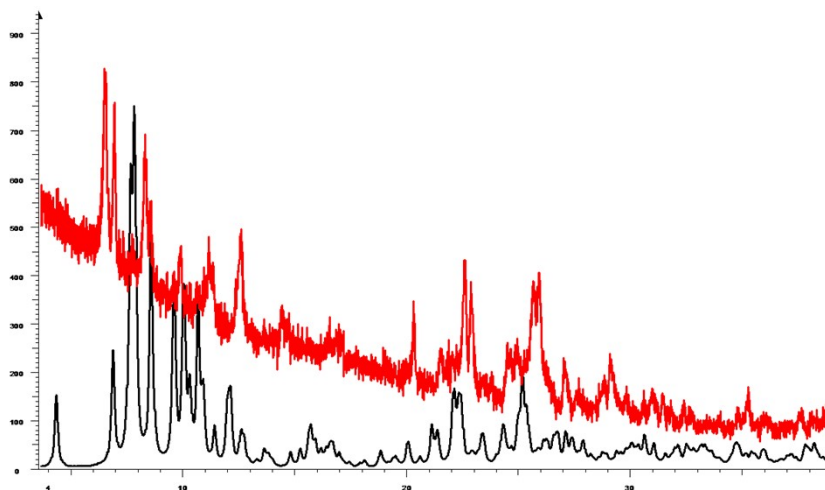

**Figure S7.** The simulated powder diffractogram (black line) calculated from the single-crystal X-ray data for **7** and the experimental powder diffractogram (red line) of the dried powder sample.

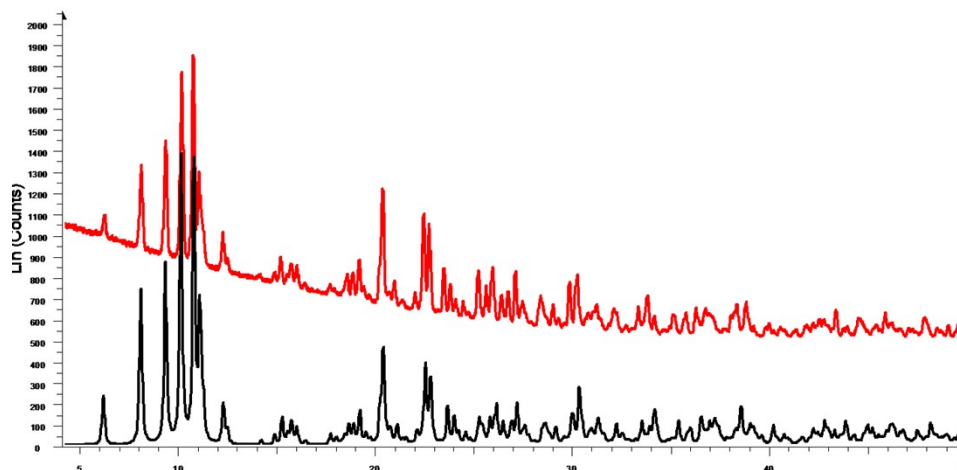

**Figure S8.** The simulated powder diffractogram (black line) calculated from the single-crystal X-ray data for **8** and the experimental powder diffractogram (red line) of the dried powder sample.

### 3. Photophysical properties

#### Experimental data

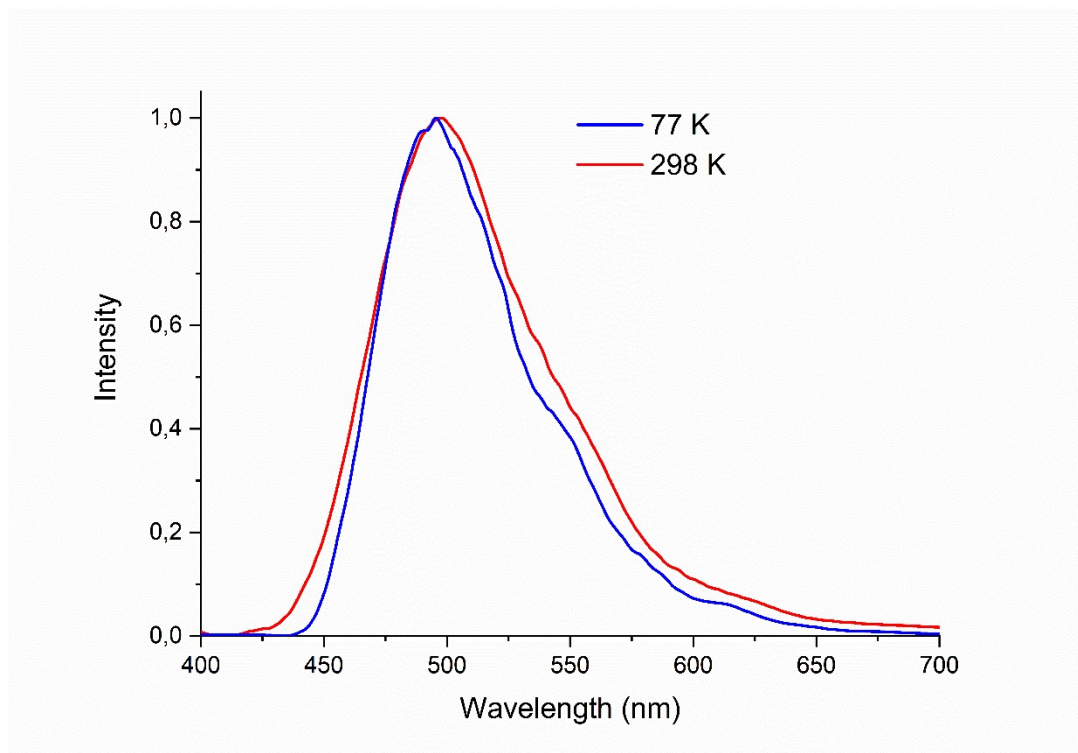

**Figure S9.** The solid-state emission spectra of complex **5** at 298 and 77 K.

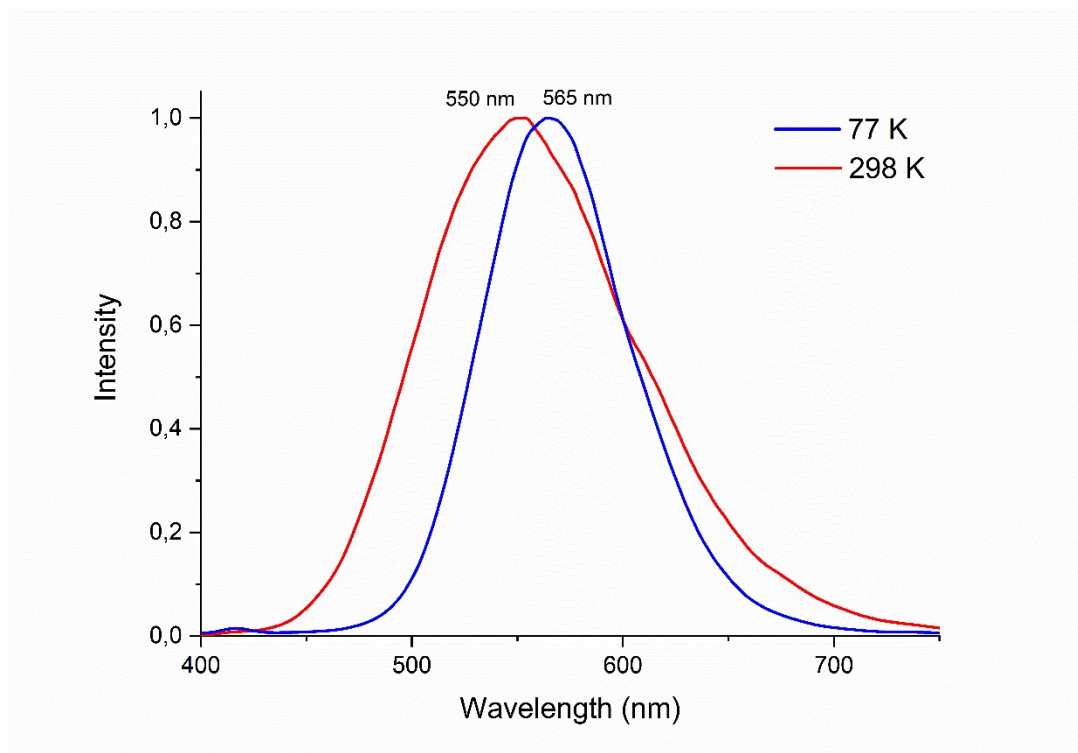

**Figure S10.** The solid-state emission spectra of complex **7** at 298 and 77 K.

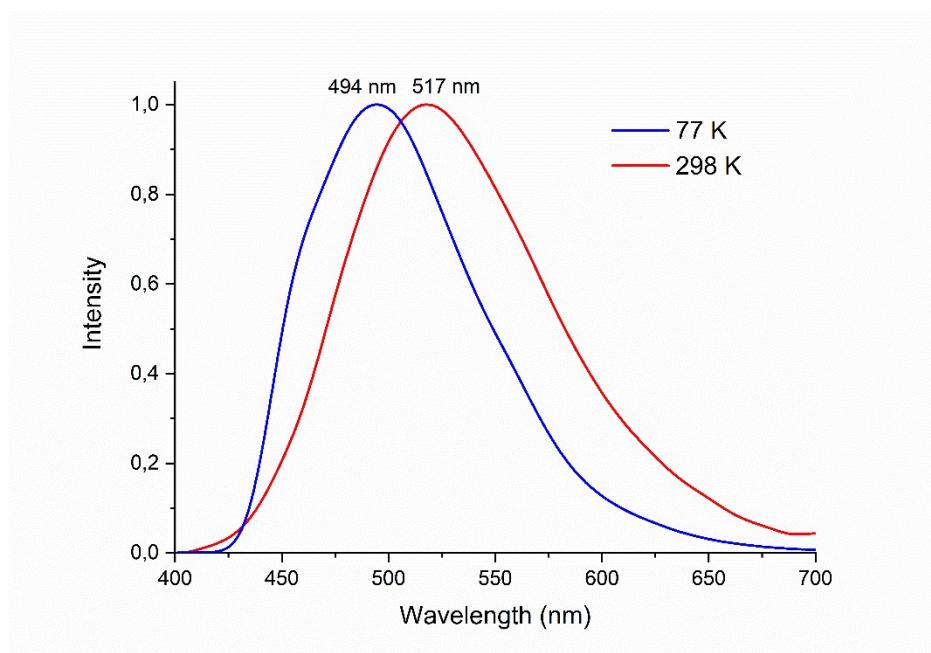

**Figure S11.** The solid-state emission spectra of complex **8** at 298 and 77 K.

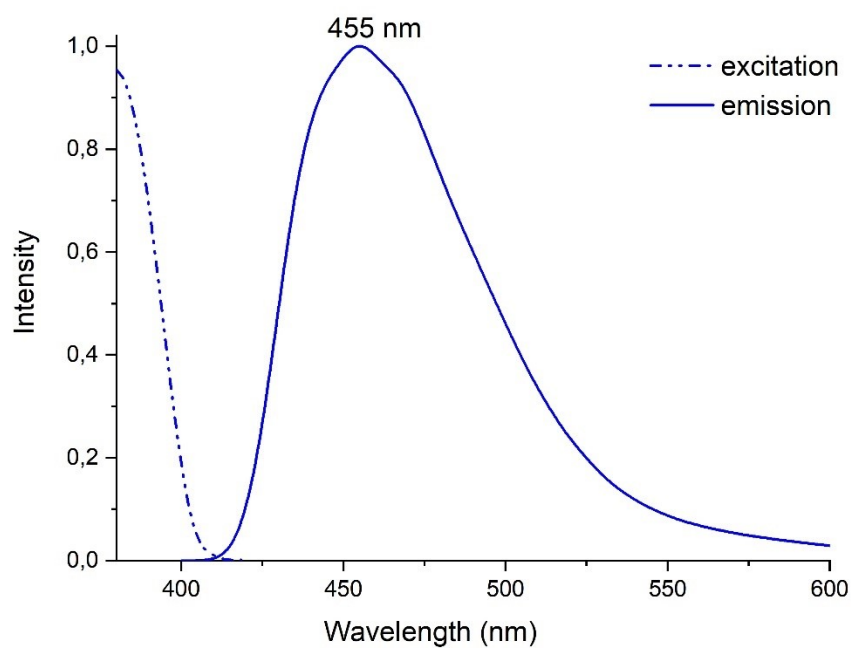

**Figure S12.** The solid-state excitation and emission spectra of complex **6** at 77 K.

**DFT-computed data**

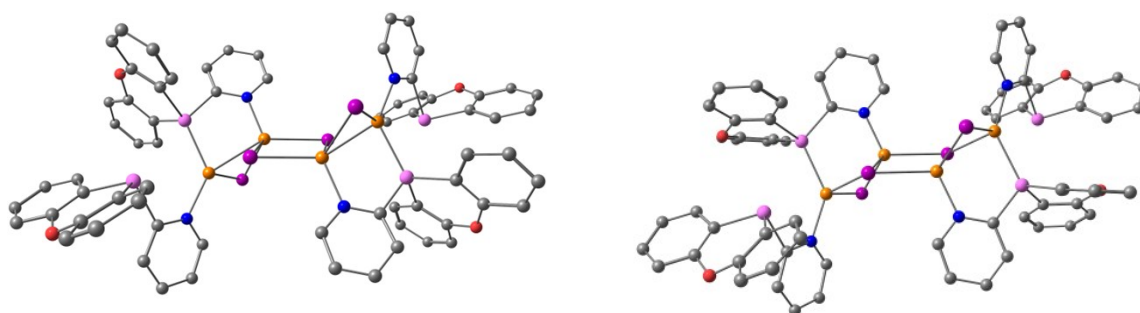

**Figure S12.** The optimized structures for the singlet ground state  $S_0$  (*left*) and the lowest triplet state  $T_1$  obtained with accounting for the  $C_i$  symmetry found in the solid state (*right*) (complex **5**).

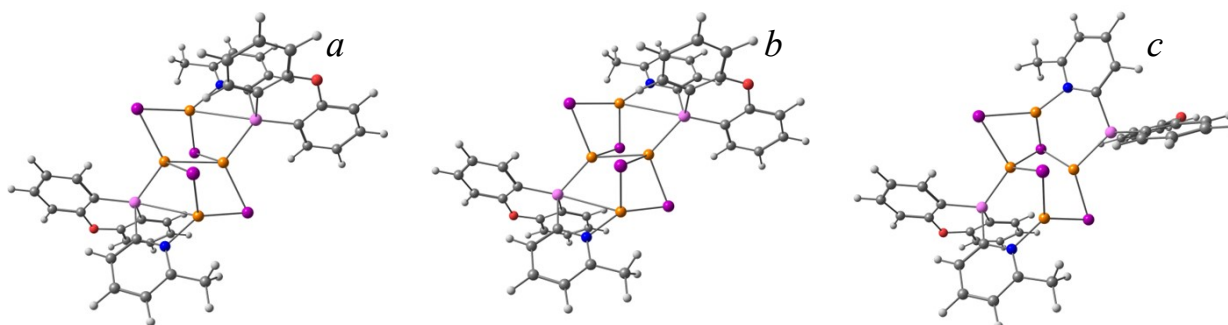

**Figure S13.** The optimized structures for the singlet ground state  $S_0$  (*a*) and the lowest triplet state  $T_1$  obtained with (*b*) and without (*c*) accounting for the  $C_i$  symmetry found in the solid state (complex **6**).



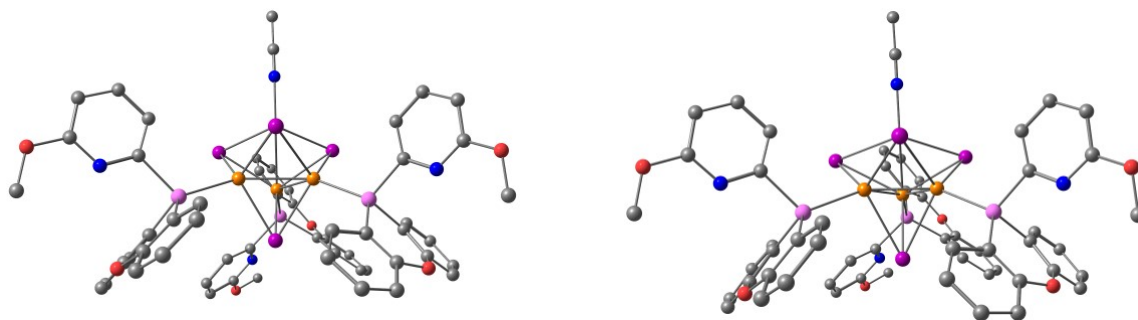

**Figure S14.** The optimized structures for the singlet ground state  $S_0$  (*left*) and the lowest triplet state  $T_1$  obtained with freezing the torsion angles within the cubane core (*right*) (complex **7**).

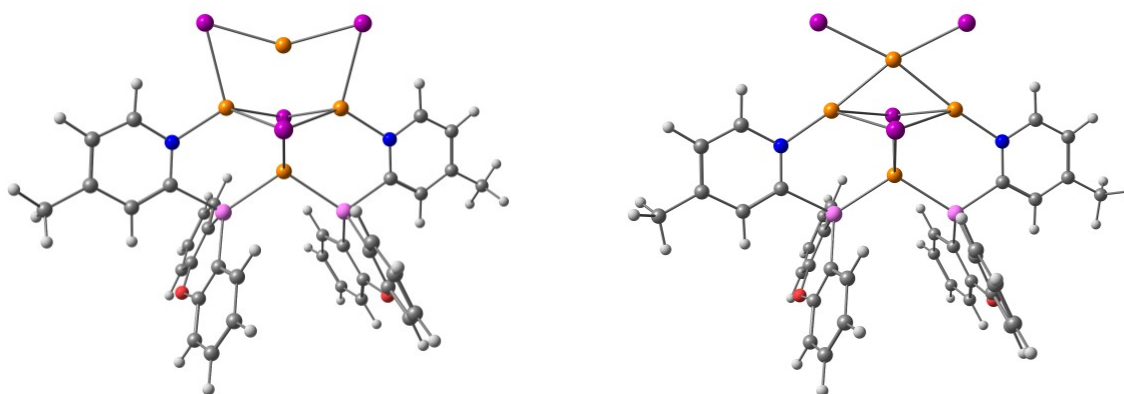

**Figure S15.** The optimized structures for the singlet ground state  $S_0$  (*left*) and the lowest triplet state  $T_1$  obtained with accounting for the  $C_2$  symmetry found in the solid state (*right*) (complex **8**).



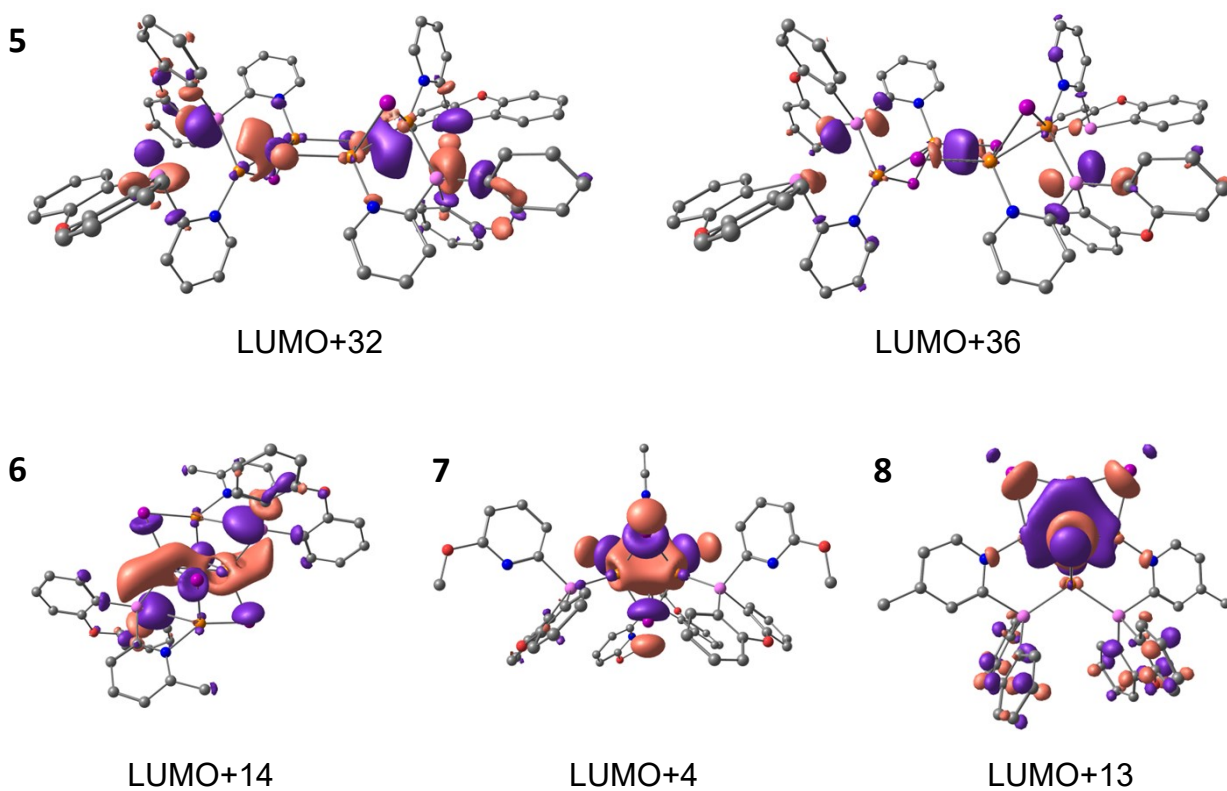

**Figure S16.** The core-based unoccupied MOs of the singlet ground state calculated at the equilibrium  $S_0$  geometry (complexes **5–8**).

#### 4. A collection of the Cu...Cu distance for different Cu<sub>4</sub>I<sub>4</sub> tetramers

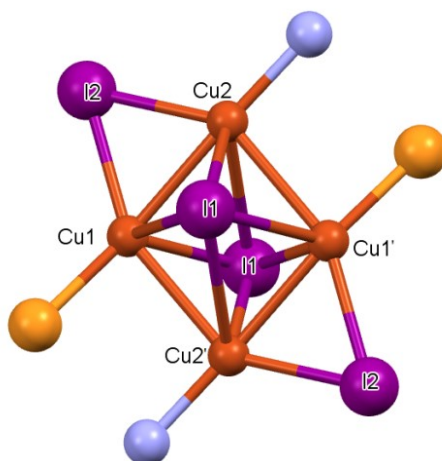

**Table S8.** Selected bond lengths (Å) for octahedral Cu(I) complexes in the Cambridge Structural Database.

| CCDC Identifier | Ligand type | Ligand                                                                            | Cu1–Cu2, Å      | Cu1...Cu2', Å  | Cu1–Cu2–Cu1', ° | Cu2–Cu1'–Cu2', ° | Ref. |
|-----------------|-------------|-----------------------------------------------------------------------------------|-----------------|----------------|-----------------|------------------|------|
| FALXIZ01        | N           | quinoline                                                                         | 2.874<br>2.549  | 3.453<br>3.453 | 81.8            | 86.6             | [S1] |
| IVAHIZ          | N           | 1-(2-(3,5-dimethyl-1H-pyrazol-1-yl)ethyl)-2-methyl-1,2-dicarba-dodecaborane       | 2.592           | 2.929          | 98.1            | 81.9             | [S2] |
| FICXOH          | N,N         | 5- <i>t</i> -butyl-3-(1-methylpyridin-1-ium-4-yl)-1H-pyrazol-1-yl                 | 2.544*<br>2.549 | 2.891<br>2.834 | 79.2<br>69.2    | 100.8<br>110.8   | [S3] |
| FICXUN01        | N,N         | 3-(1-methylpyridin-1-ium-4-yl)-5-(trifluoromethyl)-1H-pyrazol-1-yl                | 2.520           | 2.918          | 83.3            | 96.7             | [S3] |
| FICYIC          | N,N         | 3-(1-methylpyridin-1-ium-4-yl)-5-phenyl-1H-pyrazol-1-yl                           | 2.572           | 2.907          | 95.7            | 84.3             | [S3] |
| BEWCAI          | P,P         | (dicyclohexylphosphino)methane                                                    | 2.576           | 3.005          | 91.3            | 88.7             | [S4] |
| JODQIE          | P,P         | tetrakis(4-allyl-2-methoxyphenyl)phenylimidodiphosphite                           | 2.640           | 2.891          | 91.8            | 88.2             | [S5] |
| JODQOK          | P,P         | tetrakis(2-allylphenyl)phenylimidodiphosphite                                     | 2.568           | 2.833          | 90.4            | 89.6             | [S5] |
| QUGRIW          | P,P         | 5-[bis(2,4,6-trimethylphenyl)boranyl]-2-(diphenylphosphino)-1-methyl-1H-imidazole | 2.504           | 2.829          | 89.7            | 90.3             | [S6] |
| QUGSET          | P,P         | 2-(diphenylphosphanyl)-1-methyl-1H-imidazole                                      | 2.464           | 2.784          | 79.2            | 100.8            | [S6] |
| ZUDNUJ          | P,P         | μ <sub>2</sub> -bis(methyl(2,4,6-triisopropylphenyl)phosphino)methane)            | 2.660           | 2.810          | 97.1            | 82.9             | [S7] |

| CCDC Identifier | Ligand type | Ligand                                                                                                             | Cu1–Cu2, Å       | Cu1...Cu2', Å  | Cu1–Cu2–Cu1', ° | Cu2–Cu1'–Cu2', ° | Ref.  |
|-----------------|-------------|--------------------------------------------------------------------------------------------------------------------|------------------|----------------|-----------------|------------------|-------|
| IDUKEA          | P,N         | 2-(diphenylphosphanyl)pyridine                                                                                     | 2.539            | 2.705          | 89.1            | 90.9             | [S8]  |
| RUXNOP          | P,N         | 4-methyl-2-(phospholan-1-yl)pyridine                                                                               | 2.521            | 2.788          | 96.7            | 83.3             | [S9]  |
| RUXPEH          | P,N         | 2-(phospholan-1-yl)pyridine                                                                                        | 2.555            | 2.672          | 96.6            | 83.4             | [S9]  |
| XOMTUQ          | P,N         | 2-(diphenylphosphino)pyridine                                                                                      | 2.588**<br>2.574 | 2.750<br>2.699 | 81.8<br>83.1    | 90.8<br>91.6     | [S10] |
| AKUMIF          | P,N         | 2-(diphenylphosphanyl)-4-methylpyridine                                                                            | 2.540**<br>2.540 | 2.760<br>2.696 | 93.4<br>94.9    | 85.0<br>86.4     | [S11] |
| AKUMOL          | P,N         | 2-(diphenylphosphanyl)-6-methylpyridine                                                                            | 2.668            | 2.748          | 61.8            | 118.2            | [S11] |
| BETVIJ          | P,N         | $\mu$ -1,3-bis(diphenylmethyl)-5-(pyridin-2-yl)-1,3,5-diazaphosphinane                                             | 2.548            | 2.722          | 90.4            | 89.6             | [S12] |
| BETWAC          | P,N         | $\mu$ -1,3-bis(diphenylmethyl)-5-(pyridin-2-yl)-1,3,5-diazaphosphinane, solvate with C <sub>6</sub> H <sub>6</sub> | 2.556            | 2.896          | 84.5            | 95.5             | [S12] |
| BETVOP          | P,N         | $\mu$ -1,3-bis(diphenylmethyl)-5-(pyridin-2-yl)-1,3,5-diazaphosphinane solvate with acetone                        | 2.540            | 2.712          | 92.5            | 87.5             | [S12] |
| BETVUV          | P,N         | $\mu$ -1,3-bis(diphenylmethyl)-5-(pyridin-2-yl)-1,3,5-diazaphosphinane                                             | 2.565            | 2.805          | 84.2            | 95.8             | [S12] |
| CUGCEO          | P,N         | 2-(diphenylphosphino)pyridine                                                                                      | 2.574**<br>2.583 | 2.682<br>2.750 | 91.9<br>90.5    | 82.2<br>80.7     | [S13] |
| HATSIG          | P,N         | 2-((diphenylphosphino)methyl)pyridine                                                                              | 2.525            | 2.942          | 90.8            | 89.2             | [S14] |
| HATSOM          | P,N         | 2-((di- <i>t</i> -butylphosphino)methyl)pyridine                                                                   | 2.630            | 2.839          | 96.5            | 83.5             | [S14] |
| HATSUS          | P,N         | 2-((diisopropylphosphino)methyl)pyridine                                                                           | 2.620            | 2.880          | 87.1            | 92.9             | [S14] |
| HATTAZ          | P,N         | 2-((dicyclohexylphosphino)methyl)pyridine                                                                          | 2.574            | 2.930          | 92.3            | 87.7             | [S14] |
| HATTED          | P,N         | 2-((diethylphosphino)methyl)pyridine                                                                               | 2.562            | 3.035          | 98.5            | 81.5             | [S14] |

\* two independent molecules

\*\* Cu<sub>4</sub> is not planar, dihedral angles Cu1–Cu2–Cu1'–Cu2' are 25.7°, 4.0° and 29.7° for XOMTUQ, AKUMIF, CUGCEO, respectively.

**Table S9.** Selected bond lengths (Å) for stair-step complexes in the Cambridge Structural Database.

| <b>CCDC Identifier</b> | <b>Ligand type</b> | <b>Ligand</b>                                                                             | <b>Cu...Cu, Å</b>       | <b>Ref.</b> |
|------------------------|--------------------|-------------------------------------------------------------------------------------------|-------------------------|-------------|
| UGALUM                 | S                  | 3-ethyl-1,3-benzothiazole-2(3H)-thione                                                    | 3.143 (x2);<br>3.367    | [S15]       |
| KITPEK                 | N                  | 1,4-bis(pyridin-4-ylmethyl)piperazine                                                     | 2.719 (x2);<br>3.145    | [S16]       |
| HEQCUE                 | P                  | triphenylphosphine                                                                        | 2.770 (x2);<br>3.435    | [S17]       |
| DEDXIW                 | P                  | 4-(diphenylphosphanyl)benzoic acid                                                        | 2.719 (x2);<br>3.196    | [S18]       |
| DEFKUX                 | P                  | triphenylphosphine                                                                        | 2.815 (x2);<br>3.489    | [S18]       |
| IGIJIT                 | P                  | triphenylphosphine                                                                        | 2.771 (x2);<br>3.424    | [S19]       |
| MARDER                 | N^N                | 1,3-bis((2-methyl-1H-imidazol-1-yl)methyl)benzene                                         | 2.708 (x2);<br>2.889    | [S20]       |
| MOFVEK                 | P^P                | 1,1'-bis(di-t-butylphosphanyl)ferrocene                                                   | 2.731<br>3.912<br>2.734 | [S21]       |
| XIVHER                 | N, N^N             | acetonitrile / 3,7-di(pyridin-3-yl)-1,5,3,7-dioxadiazocane                                | 2.747 (x2);<br>3.084    | [S22]       |
| YOQXOT                 | N, N^N             | acetonitrile / 2,2'-(1,4-phenylenebis(methylenesulfaneyl))bis(5-methyl-1,3,4-thiadiazole) | 2.817 (x2);<br>2.621    | [S23]       |
| EPUNAH                 | N, P^N             | acetonitrile / N-[(diphenylphosphino)methyl]pyrimidin-2-amine                             | 2.828 (x2);<br>3.474    | [S24]       |
| YUMCAN                 | P, P^N             | 2,2',2''-[phosphanetriyltri(ethane-2,1-diyl)]tripyrindine                                 | 3.392 (x2);<br>2.774    | [S25]       |
| UQOVEE                 | N, S^N             | 2-(ethylsulfanyl)-1,3-benzothiazole                                                       | 3.168 (x2);<br>3.567    | [S26]       |
| PIVQES                 | P, P^N             | 2-(diphenylphosphino)-5-phenyl-1,3,4-oxadiazole                                           | 2.790 (x2);<br>3.185    | [S27]       |
| PIVQIW                 | P, P^N             | 2-(diphenylphosphino)-5-phenyl-1,3,4-oxadiazole                                           | 2.793 (x2);<br>3.077    | [S27]       |
| PIVQUI                 | P, P^N             | 2-(diphenylphosphino)-5-phenyl-1,3,4-thiadiazole                                          | 2.702 (x2);<br>2.898    | [S27]       |
| AXAGUE                 | N^N^S              | 6,6'-bis[(benzylsulfanyl)methyl]-2,2'-bipyridine                                          | 2.692 (x2);<br>2.981    | [S28]       |
| SADYED<br>01           | N^S^N              | 2,2'-disulfaneyldipyridine                                                                | 2.668 (x2);<br>2.924    | [S29]       |
| GUPMAH                 | N^N^N              | 2-((4-((benzylsulfanyl)methyl)-1H-1,2,3-triazol-1-yl)methyl)pyridine                      | 2.615 (x2);<br>2.783    | [S30]       |
| YUSCAR                 | N^N^N              | 4,4'-(1,2-phenylene)bis(1-benzyl-1H-1,2,3-triazole)                                       | 2.631 (x2);<br>2.746    | [S31]       |

| <b>CCDC Identifier</b> | <b>Ligand type</b>              | <b>Ligand</b>                                                             | <b>Cu...Cu, Å</b>         | <b>Ref.</b> |
|------------------------|---------------------------------|---------------------------------------------------------------------------|---------------------------|-------------|
| YUSCIZ                 | N <sup>^</sup> N <sup>^</sup> N | 4,4'-(4,5-difluoro-1,2-phenylene)bis(1-benzyl-1H-1,2,3-triazole)          | 2.644 (x2);<br>2.740      | [S31]       |
| DOVPAH                 | N <sup>^</sup> N <sup>^</sup> N | 2-(1H-1,2,3-triazol-1-ylmethyl)quinoline                                  | 2.652 (x2);<br>2.860      | [S32]       |
| DOVPEL                 | N <sup>^</sup> N <sup>^</sup> N | 2-((4-propyl-1H-1,2,3-triazol-1-yl)methyl)quinoline                       | 2.670 (x2);<br>2.992      | [S32]       |
| DOVPIP                 | N <sup>^</sup> N <sup>^</sup> N | 2-((4-n-butyl-1H-1,2,3-triazol-1-yl)methyl)quinoline                      | 2.707 (x2);<br>3.072      | [S32]       |
| DOVPOV                 | N <sup>^</sup> N <sup>^</sup> N | 2-((4-isobutyl-1H-1,2,3-triazol-1-yl)methyl)quinoline                     | 2.597 (x2);<br>3.001      | [S32]       |
| DOVPUB                 | N <sup>^</sup> N <sup>^</sup> N | (1-(quinolin-2-ylmethyl)-1H-1,2,3-triazol-4-yl)methanol                   | 2.639 (x2);<br>2.953      | [S32]       |
| TUGPAP                 | N <sup>^</sup> N <sup>^</sup> N | bis(μ-3,3'-(ethane-1,2-diyl)bis(4,4,5-trimethyl-4H-pyrazole))             | 2.777 (x2);<br>2.680      | [S33]       |
| ZUGHAM                 | N <sup>^</sup> N <sup>^</sup> N | 5-propyl-3-(pyridin-2-ylmethyl)-1H-1,2,3-triazole-1,2(3H)-diyl            | 2.676 (x2);<br>2.854      | [S34]       |
| ZUGHAM                 | N <sup>^</sup> N <sup>^</sup> N | propane-1,3-diylbis(1-((2-pyridyl)methyl)-1,2,3-triazole-4,2,3(3H)-triyl) | 2.641;<br>2,635;<br>2.969 | [S34]       |
| ZUGHIU                 | N <sup>^</sup> N <sup>^</sup> N | butane-1,4-diylbis(1-((2-pyridyl)methyl)-1,2,3-triazole-4,2,3(3H)-triyl)  | 2.642 (x2);<br>2.706      | [S34]       |

## References

- [S1] S. Wang, E. E. Morgan, S. Panuganti, L. Mao, P. Vishnoi, G. Wu, Q. Liu, M. G. Kanatzidis, R. D. Schaller, R. Seshadri, *Chem. Mater.* **2022**, *34*, 3206–3216.
- [S2] J. Soldevila-Sanmartín, E. Ruiz, D. Choquesillo-Lazarte, M. E. Light, C. Viñas, F. Teixidor, R. Núñez, J. Pons, J. G. Planas, *J. Mater. Chem. C* **2021**, *9*, 7643–7657.
- [S3] Y. D. Yu, L. Bin Meng, Q. C. Chen, G. H. Chen, X. C. Huang, *New J. Chem.* **2018**, *42*, 8426–8437.
- [S4] W. F. Fu, X. Gan, C. M. Che, Q. Y. Cao, Z. Y. Zhou, N. Nian-Yong Zhu, *Chem. – A Eur. J.* **2004**, *10*, 2228–2236.
- [S5] S. Naik, J. T. Mague, M. S. Balakrishna, *Inorg. Chem.* **2014**, *53*, 3864–3873.
- [S6] I. Avinash, S. Parveen, G. Anantharaman, *Inorg. Chem.* **2020**, *59*, 5646–5661.
- [S7] E. W. Emerson, M. F. Cain, M. D. Sanderson, C. B. Knarr, D. S. Glueck, J. C. Ahern, H. E. Patterson, A. L. Rheingold, *Inorganica Chim. Acta* **2015**, *427*, 168–172.
- [S8] A. Neshat, R. Babadi, P. Mastroilli, S. Todisco, F. Molani, *Polyhedron* **2018**, *154*, 217–228.
- [S9] E. I. Musina, A. V. Shamsieva, I. D. Strel'nik, T. P. Gerasimova, D. B. Krivolapov, I. E. Kolesnikov, E. V. Grachova, S. P. Tunik, C. Bannwarth, S. Grimme, S. A. Katsyuba, A. A. Karasik, O. G. Sinyashin, *Dalton Trans.* **2016**, *45*, 2250–2260.
- [S10] L. Maini, P. P. Mazzeo, F. Farinella, V. Fattori, D. Braga, *Faraday Discuss.* **2014**, *170*, 93–107.
- [S11] P. Boden, P. Di Martino-Fumo, J. M. Busch, F. R. Rehak, S. Steiger, O. Fuhr, M. Nieger, D. Volz, W. Klopfer, S. Bräse, M. Gerhards, *Chem. – A Eur. J.* **2021**, *27*, 5439–5452.
- [S12] I. Strel'nik, A. Shamsieva, K. Akhmadgaleev, T. Gerasimova, I. Dayanova, I. Kolesnikov, R. Fayzullin, D. Islamov, E. Musina, A. Karasik, O. Sinyashin, *Chem. – A Eur. J.* **2023**, *29*, e202202864.
- [S13] K. Chen, J. Shearer, V. J. Catalano, *Inorg. Chem.* **2015**, *54*, 6245–6256.
- [S14] Z. Liu, P. I. Djurovich, M. T. Whited, M. E. Thompson, *Inorg. Chem.* **2012**, *51*, 230–236.
- [S15] G. N. Liu, R. Y. Zhao, R. D. Xu, X. Zhang, X. N. Tang, Q. J. Dan, Y. W. Wei, Y. Y. Tu, Q. B. Bo, C. Li, *Cryst. Growth Des.* **2018**, *18*, 5441–5448.
- [S16] S. Yuan, S. S. Liu, D. Sun, *CrystEngComm.* **2014**, *16*, 1927–1933.
- [S17] Y. Xu, K. Shen, S. Mao, X. Shi, H. Wu, X. Fan, *Appl Organometal Chem.* **2018**, *32*, 4041.
- [S18] B. Huitorel, H. El Moll, M. Cordier, A. Fargues, A. Garcia, F. Massuyeau, C. Martineau-corcós, T. Gacoin, S. Perruchas, *Inorg. Chem.* **2017**, *56*, 12379–12388.
- [S19] Q. Benito, X. F. Le Goff, G. Nocton, A. Fargues, A. Garcia, A. Berhault, S. Kahlal, J. Y. Saillard, C. Martineau, J. Trébosc, T. Gacoin, J. P. Boilot, S. Perruchas, *Inorg. Chem.* **2015**, *54*, 4483–4494.
- [S20] R. Y. Wang, X. Zhang, Q. F. Yang, Q. S. Huo, J. H. Yu, J. N. Xu, J. Q. Xu, *J. Solid State Chem.* **2017**, *251*, 176–185.
- [S21] M. Trivedi, G. Singh, A. Kumar, N. P. Rath, *Dalton Trans.* **2014**, *43*, 13620–13629.
- [S22] L. Li, H. Y. Li, Z. G. Ren, J. P. Lang, *Eur. J. Inorg. Chem.* **2014**, 824–830.
- [S23] K. Xue, W. X. Chai, Y. W. Wu, C. Ling, L. Song, *J. Clust. Sci.* **2014**, *25*, 1005–1017.
- [S24] S. Kumar, D. Mondal, M. S. Balakrishna, *ACS Omega* **2018**, *3*, 16601–16614.

- [S25] A. V. Artem'ev, A. Y. Baranov, M. I. Rakhmanova, S. F. Malysheva, D. G. Samsonenko, *New J. Chem.* **2020**, *44*, 6916–6922.
- [S26] G. N. Liu, R. D. Xu, R. Y. Zhao, Y. Sun, Q. B. Bo, Z. Y. Duan, Y. H. Li, Y. Y. Wang, Q. Wu, C. Li, *ACS Sustain. Chem. Eng.* **2019**, *7*, 18863–18873.
- [S27] D. M. Zink, T. Baumann, J. Friedrichs, M. Nieger, S. Bräse, *Inorg. Chem.* **2013**, *52*, 13509–13520.
- [S28] C. G. Jiang, Y. F. Yuan, X. Y. Meng, K. K. Zhou, G. L. Zhuang, B. Li, T. Zhang, *Dalton Trans.* **2021**, *50*, 9016–9020.
- [S29] M. Pan, W. X. Zhou, W. Y. Ma, J. Niu, J. Li, *J. Coord. Chem.* **2014**, *67*, 3176–3187.
- [S30] S. Q. Bai, L. Jiang, A. L. Tan, S. C. Yeo, D. J. Young, T. S. Andy Hor, *Inorg. Chem. Front.* **2015**, *2*, 1011–1018.
- [S31] G. F. Manbeck, W. W. Brennessel, C. M. Evans, R. Eisenberg, *Inorg. Chem.* **2010**, *49*, 2834–2843.
- [S32] S.-Q. Bai, L. Jiang, D. J. Young, T. S. A. Hor, *Dalton Trans.* **2015**, *44*, 6075–6081.
- [S33] T. Yoneda, C. Kasai, Y. Manabe, M. Tsurui, Y. Kitagawa, Y. Hasegawa, P. Sarkar, Y. Inokuma, *Chem. - An Asian J.* **2020**, *15*, 601–605.
- [S34] S. Q. Bai, L. Jiang, B. Sun, D. J. Young, T. S. A. Hor, *CrystEngComm.* **2015**, *17*, 3305–3311.
